# Supplementary material for: Production by Tobacco Transplastomic Plants of Recombinant Fungal and Bacterial Cell-Wall Degrading Enzymes to Be Used for Cellulosic Biomass Saccharification
Source: Hindawi journal article supplement (doi:10.1155/2015/289759), 2015-01-01
Supplement: f1 [file 289759.f1.pdf]

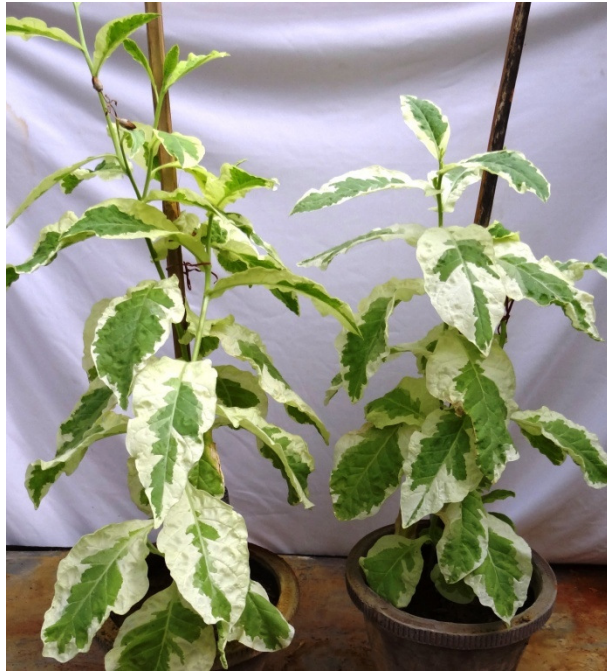

Longoni et al figure S1

**Supplementary figure (S1) legends**

Figure S1. Homoplastidial and heteroplastidial transplastomic tobacco plants expressing *cel3* gene. Possible deletion/rearrangements in the plastid DNA in the white sectors was verified using various probes in Southern hybridization.
